# Supplementary material
Source: PubMed Central journal article supplement (PMC3247652)
Supplement: NIHMS335380-supplement-1.pdf [file NIHMS335380-supplement-1.pdf]

## SUPPLEMENTAL MATERIAL

*Supplemental Table 1: LQT1 and LQT2 Mutations by Location and Amino Acid Coding*

| <b>Group</b> | <b>Location and Coding</b> | <b>Exon</b> | <b>Number of Patients</b> |
|--------------|----------------------------|-------------|---------------------------|
| <b>LQT1</b>  | <b>Pre-Pore</b>            |             |                           |
|              | Ile 235 Asn                | exon 5      | 2                         |
|              | Gly 168 Arg                | exon 3      | 5                         |
|              | Ala 46 Thr                 | exon 1      | 2                         |
|              | Arg 174 Leu                | exon 3      | 1                         |
|              | Subtotal                   |             | 10                        |
|              | <b>Pore</b>                |             |                           |
|              | Val 280 Glu                | exon 6      | 1                         |
|              | Thr 322 Met                | exon 7      | 3                         |
|              | Ala 344 Ala                | exon 7      | 1                         |
|              | Ser 349 Ter                | exon 8      | 5                         |
|              | Gly 325 Glu                | exon 7      | 1                         |
|              | Subtotal                   |             | 11                        |
|              | <b>Post-Pore</b>           |             |                           |
|              | P400 fs/62X                | exon 9      | 1                         |
|              | Arg 594 Gln                | exon 15     | 1                         |
|              | Ser 546 Leu                | exon 13     | 1                         |
|              | Arg 360 Met                | exon 8      | 1                         |
|              | Gln 530 Ter                | exon 12     | 1                         |
|              | Gly 635 Arg                | exon 16     | 1                         |
|              | Gln 359 Ter (X)            | exon 8      | 1                         |
|              | Subtotal                   |             | 7                         |
|              | <b>Other</b>               | intron 12   | 1                         |
|              |                            |             |                           |
| <b>LQT2</b>  | <b>Pore</b>                |             |                           |
|              | Ile 593 Lys                | exon 7      | 1                         |
|              | Leu 552 Ser                | exon 7      | 5                         |
|              | His 562 Arg                | exon 7      | 1                         |
|              | Thr 613 Met                | exon 7      | 1                         |
|              | Gly 628 Ser                | exon 7      | 1                         |
|              | Pro 605 Leu                | exon 7      | 1                         |

|  |                 |        |    |
|--|-----------------|--------|----|
|  | Thr 613 Met     | exon 7 | 1  |
|  | Subtotal        |        | 11 |
|  | <b>Non-pore</b> |        |    |
|  | His 70 Arg      | exon 2 | 1  |
|  | Pro 123 fs +15x | exon 2 | 1  |
|  | Arg 176 Trp     | exon 4 | 3  |
|  | Thr 74 Arg      | exon 2 | 1  |
|  | Pro 347 Ser     | exon5  | 1  |
|  | Val 94 Met      | exon 2 | 1  |
|  | Pro 393 Leu     | exon 6 | 2  |
|  | Subtotal        |        | 10 |

*Supplemental Table 2: QTc Intervals (ms) During EST in LQTS Patients with and without Beta-Blockers.*

|                        | Rest   | Peak exercise | 1 min recovery | 3 min recovery | 5 min recovery | 7 min recovery | 9 min recovery |
|------------------------|--------|---------------|----------------|----------------|----------------|----------------|----------------|
| <b>LQT1</b>            |        |               |                |                |                |                |                |
| Beta-Blocker (n=17)    | 450±23 | 479±31        | 491±42         | 485±30         | 484±20         | 480±24         | 480±25         |
| No Beta-Blocker (n=12) | 454±39 | 495±37        | 474±29         | 495±44         | 489±39         | 487±33         | 491±36         |
| <i>P</i> -value        | 0.75   | 0.22          | 0.24           | 0.48           | 0.67           | 0.5            | 0.36           |
| <b>LQT2</b>            |        |               |                |                |                |                |                |
| Beta-Blocker (n=10)    | 491±38 | 429±16        | 425±16         | 457±36         | 475±20         | 474±18         | 482±20         |
| No Beta-Blocker (n=11) | 460±25 | 447±39        | 441±32         | 464±33         | 462±23         | 482±20         | 474±25         |
| <i>P</i> -value        | 0.05   | 0.18          | 0.18           | 0.64           | 0.17           | 0.32           | 0.83           |

*Supplemental Table 3: QTc Intervals (ms) During EST in Concealed (cLQT) Patients.*

|                | cLQT1  | cLQT2  | <i>P</i> -value |
|----------------|--------|--------|-----------------|
| Rest           | 428±25 | 440±14 | 0.25            |
| Peak exercise  | 467±26 | 441±24 | 0.04            |
| 1 min recovery | 471±39 | 428±28 | 0.01            |
| 3 min recovery | 477±42 | 456±34 | 0.68            |

|                |        |        |      |
|----------------|--------|--------|------|
| 5 min recovery | 474±27 | 466±23 | 0.49 |
| 7 min recovery | 475±34 | 472±17 | 0.78 |
| 9 min recovery | 472±34 | 471±19 | 0.95 |

*Supplemental Table 4: QTc intervals during EST Based on LQT1 and LQT2 Gene Location*

|             | <b>Peak Exercise</b> | <b>1 minute</b> | <b>3 minutes</b> | <b>5 minutes</b> | <b>7 minutes</b> | <b>9 minutes</b> |
|-------------|----------------------|-----------------|------------------|------------------|------------------|------------------|
| <b>LQT1</b> |                      |                 |                  |                  |                  |                  |
| Pre-Pore    | 456±40               | 458±37          | 472±41           | 482±25           | 481±21           | 482±30           |
| Pore        | 471±30               | 456±37          | 470±30           | 470±23           | 480±27           | 475±26           |
| Post-Pore   | 482±60               | 461±45          | 490±40           | 484±23           | 490±30           | 473±25           |
| <b>LQT2</b> |                      |                 |                  |                  |                  |                  |
| Non-Pore    | 471±34               | 458±28          | 472±32           | 471±30           | 476±27           | 479±24           |
| Pore        | 472±51               | 475±52          | 488±53           | 489±42           | 485±27           | 489±37           |

*P*-value NS for comparison of LQT1 pre-pore vs. pore vs post pore

*P*-value NS for comparison of LQT2 non-pore vs. pore
